# Supplementary material
Source: PubMed Central journal article supplement (PMC4694051)
Supplement: NIHMS742924-supplement-Suppl__Fig__1-5.pdf [file NIHMS742924-supplement-Suppl__Fig__1-5.pdf]

# Supplementary Figure S1

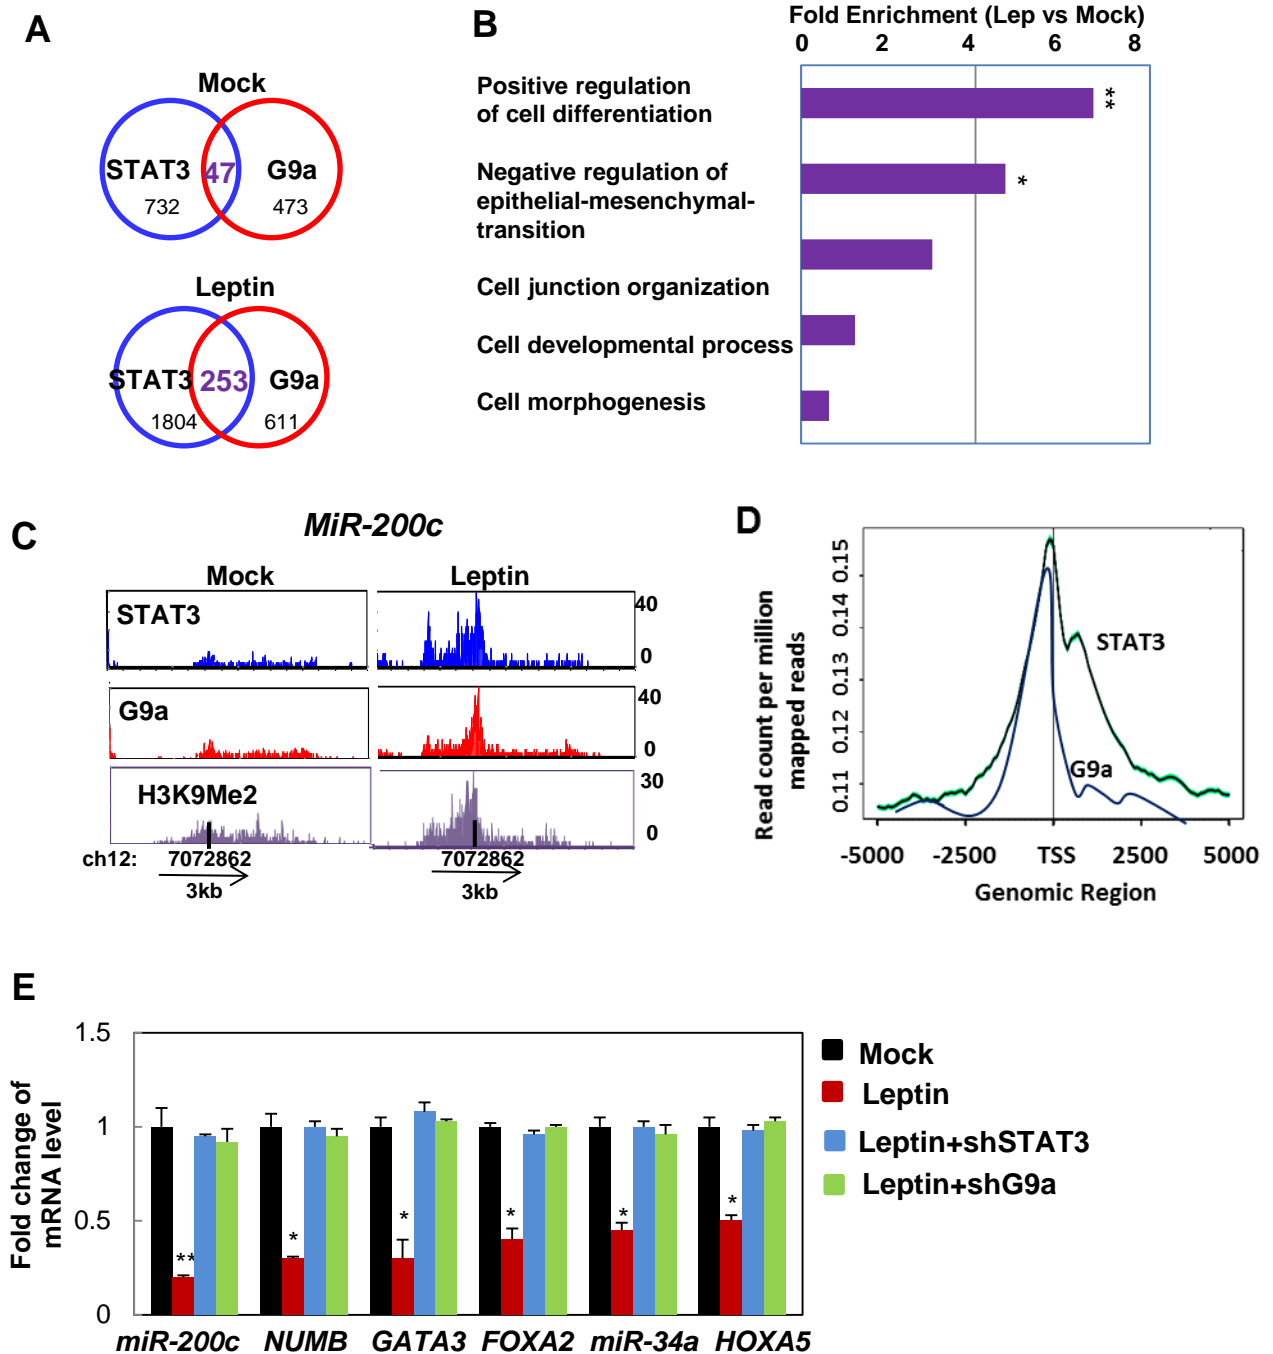

**Supplementary Figure S1 Leptin induces STAT3-G9a interaction and their co-occupancy on targeted gene promoters. (A)** Venn diagram showing overlap of STAT3 and G9a bound genes. **(B)** Gene ontology functional annotation of STAT3 and G9a bound genes showing enrichment in specific biological processes. ChIP-seq results for **(C)** STAT3-G9a co-occupied *MiR-200c* with enhanced H3K9Me2 (bar positions denote the TSS) and **(D)** STAT3 and G9a peak distribution around TSS. **(E)** Fold change of miRNA/mRNA expression in MCF7 cells that expressed shSTAT3 or shG9a under leptin treatment (n=3, asterisk indicates P<0.05, double asterisk indicates P<0.01). Error bars denote  $\pm$ SD.

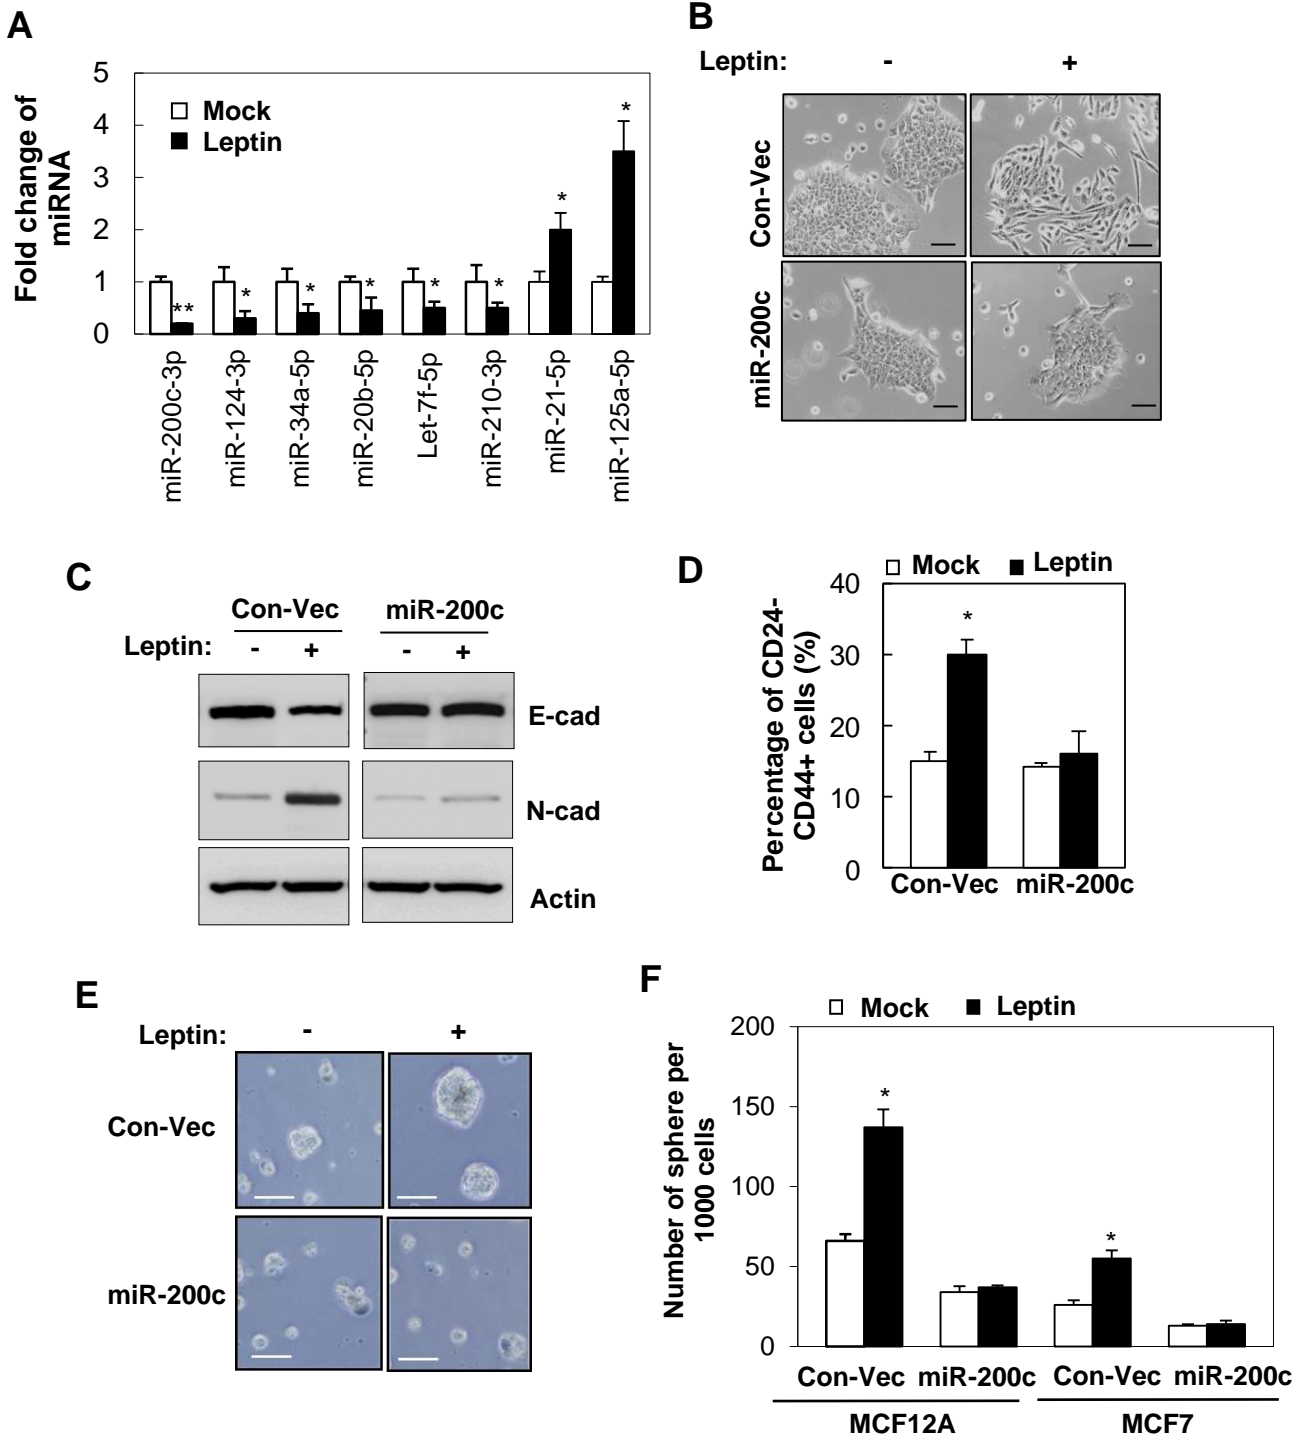

**Supplementary Figure S2 Leptin induces EMT and stem cell-like traits via down-regulation of miR-200c.** (A) Genome-wide human miRNA array analysis showing miRNAs with significant expression changes in MCF12A cells treated with 50 ng/mL leptin for 12 hours ( $> 2$  fold,  $n=3$ , asterisk indicates  $P<0.05$ , double asterisk indicates  $P<0.01$ ). (B) Cell morphological change, (C) EMT protein expression (E-cadherin and N-cadherin), and (D) the percentage of CD24-CD44<sup>+</sup> population in MCF12A cells that stably expressed miR-200c and treated with 50 ng/mL leptin for 3 days (scale bar: 20  $\mu$ m,  $n=3$ , asterisk indicates  $P<0.05$ ). (E) Representative images of spheres generated from MCF12A cells, and (F) the number of spheres generated from MCF12A and MCF7 cells that stably expressed miR-200c and treated with 50 ng/mL leptin for 7 days (scale bar: 100  $\mu$ m,  $n=3$ , asterisk indicates  $P<0.05$ ). Error bars denote  $\pm$ SD.

## Supplementary Figure S3

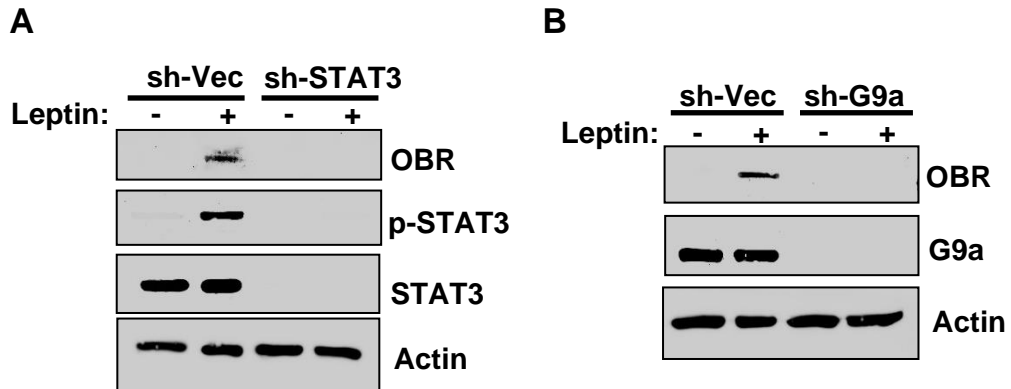

**Supplementary Figure S3 STAT3 and G9a expression is required for OBR induction by leptin.** OBR protein expression levels in MCF7 cells that stably expressed **(A)** sh-STAT3 or **(B)** sh-G9a or the control sh-Vec under leptin treatment.

# Supplementary Figure S4

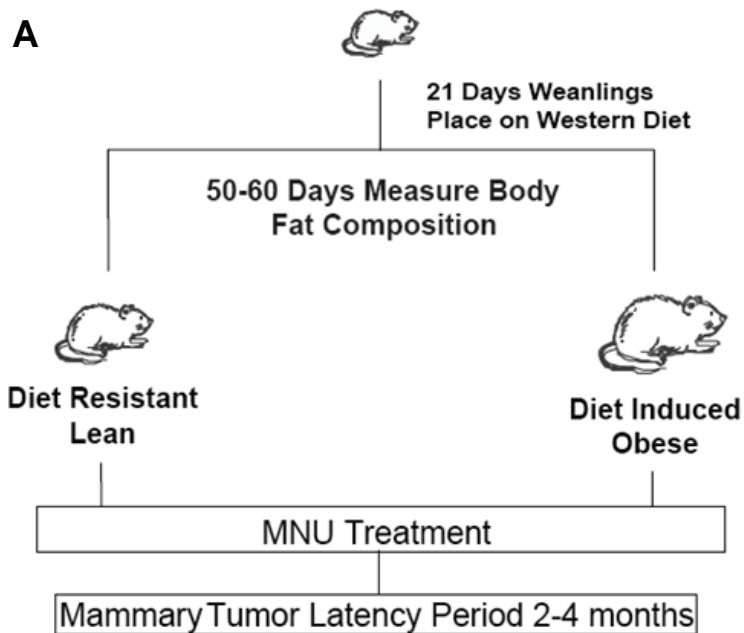

**B**

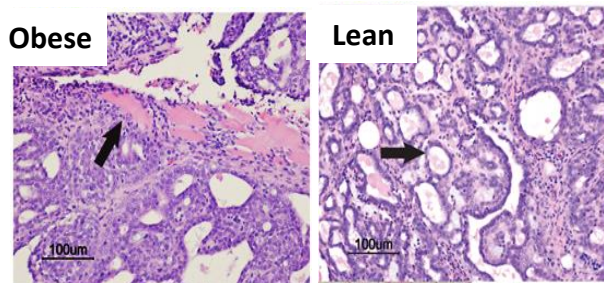

**Supplementary Figure S4 Distinct tumor phenotypes in Western obese animals compared to lean animals. (A)** Animals in the highest tertile of body fat (determined by DEXA scan) were placed in the Western-obese group and those in the lowest tertile placed in the Western-lean group. Rats were then injected with 50 mg/kg MNU. Animals were palpated by 8 weeks after MNU injection and tumor incidences were monitored. **(B)** H&E staining showing aggressive adenocarcinoma (with tumor epithelial cells invading adjacent muscle tissue, black arrow) is the predominant tumor type in Western-obese animals, while Western-lean animals manifest benign adenoma (with low cuboidal epithelial cells forming duct-like structures, black arrow). Error bars denote  $\pm$ SD.

# Supplementary Figure S5

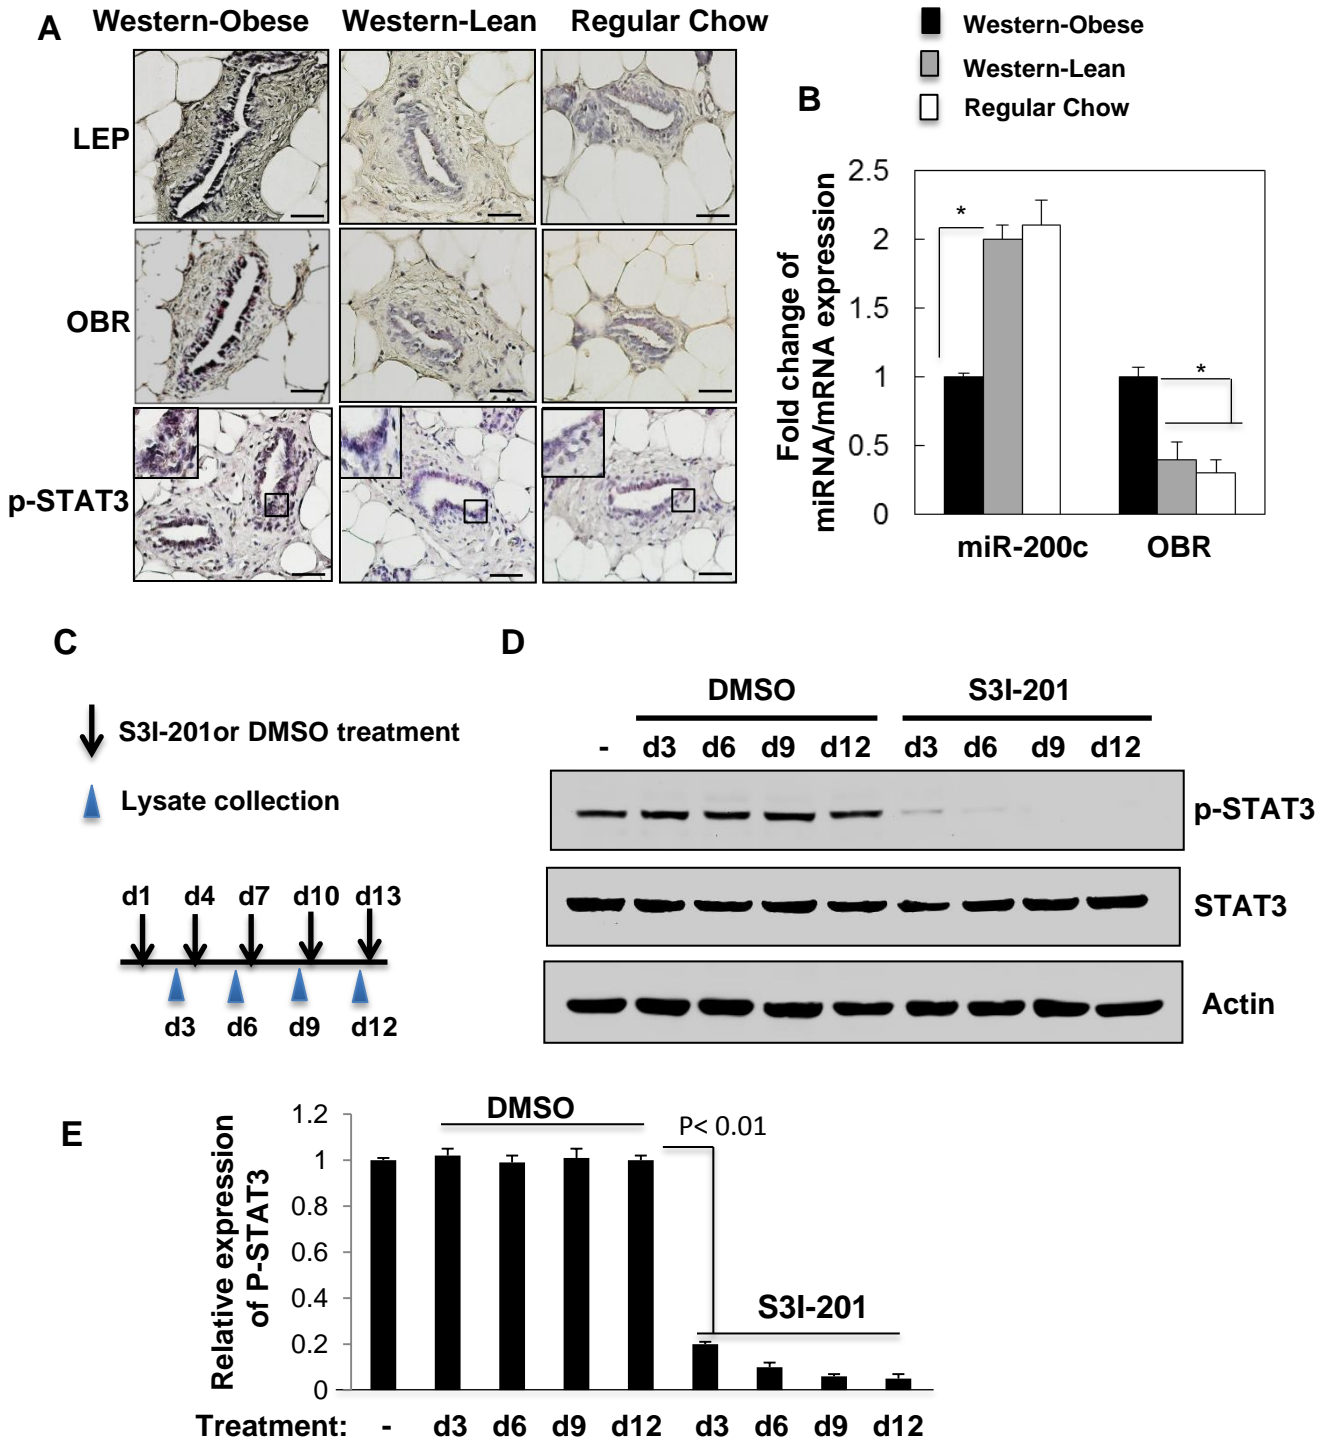

**Supplementary Figure S5 STAT3 activation and OBR overexpression in diet-induced obesity rats. (A)** Representative leptin (LEP), p-STAT3, and OBR staining, and **(B)** fold change of miRNA/mRNA expression in mammary tissues of the obese and lean rats with Western diet, and the control rats with regular diet (scale bar=100um, n=5 animals/group, asterisk indicates P<0.05). **(C, D)** Immunoblots showing p-STAT3 levels in the tumor lysates collected on the indicated days (in between the days of treatment) from the MNU-treated obese rats with Western diet treated with S3I-201 or DMSO. **(E)** Quantification of p-STAT3 expression in (D) by ImageJ densitometry analysis (relative p-STAT3 level is normalized with total STAT3 and Actin, n=5 animals/group). Error bars denote  $\pm$ SD.
