# Supplementary material
Source: PubMed Central journal article supplement (PMC4694051)
Supplement: NIHMS742924-supplement-Suppl__Tables_1-6.pdf [file NIHMS742924-supplement-Suppl__Tables_1-6.pdf]

## Supplementary Table S1

| Protein modification       | Ratio of means<br>(Leptin/ Mock) |
|----------------------------|----------------------------------|
| STAT3-phospho (Tyr705)     | 10.5                             |
| mTOR-phospho (Ser2448)     | 3.2                              |
| AKT-phospho (Ser473)       | 2.2                              |
| Caspase-3-cleaved (Asp175) | -3.4                             |

**Table S1** List of proteins with expression levels significantly changed in MCF7 cells under leptin treatment using antibody array (>2 fold change, n=3, P<0.05).

## Supplementary Table S2

| Accession | Description                                                           | Coverage | # Unique Peptides |
|-----------|-----------------------------------------------------------------------|----------|-------------------|
| Q96KQ7    | Histone-lysine N-methyltransferase EHMT2 (G9A)                        | 53.95    | 28                |
| P63104    | 14-3-3 protein zeta/delta (14-3-3 $\zeta/\delta$ )                    | 42.13    | 17                |
| P52333    | Tyrosine-protein kinase (JAK3)                                        | 36.93    | 15                |
| P04412    | Epidermal growth factor receptor (EGFR)                               | 33.65    | 13                |
| Q70UQ0    | Inhibitor of nuclear factor kappa-B kinase-interacting protein (IKIP) | 25.25    | 7                 |
| F5GXM1    | Histone deacetylase 1 (HDAC1)                                         | 20.24    | 3                 |

**Table S2 G9a is a new STAT3-associated protein under leptin treatment.** LC-MS/MS mass spectrometry analysis identifies a list of proteins that physically interact with STAT3 under leptin treatment (but not under the mock treatment) in MCF7 cells.

## Supplementary Table S3

| Term                                                             | Genes                                                           | FDR      |
|------------------------------------------------------------------|-----------------------------------------------------------------|----------|
| GO:0045597~positive regulation of cell differentiation           | XRCC2, MSR1, THRB, CSF1, PAX6, KITLG, GATA3, FOXA2, NUMB, HOXA5 | 0.172963 |
| GO:0010719~negative regulation of EMT                            | FOXA2, NKX2-1, TGFBR3, EFNA1, DAB2IP, HOXA5, HPN, DACT3         | 0.236285 |
| GO:0051130~positive regulation of cellular junction organization | CAV1, ARF6, PDPK1, NUMB, NPM1, TNKS2, UBE2N, NCK2               | 0.470977 |
| GO:0010720~regulation of cell development                        | GATA3, ARHGEF1, LYN, MAP1B, HOXA5, NUMB                         | 0.370416 |
| GO:0022604~regulation of cell morphogenesis                      | GAS2, TTC3, NRCAM, ANXA7, FYN, NUMB, CDH1                       | 0.482653 |

**Table S3 STAT3-G9a regulates a cohort of genes involved in cell differentiation process.** Gene ontology enrichment analysis of gene promoters co-occupied by STAT3 and G9a under leptin treatment in MCF7 cells.

## Supplementary Table S4

| Group         | Scale Body Weight | DEXA Body Weight | % Bone Mass | % Fat Mass | % Lean Mass |
|---------------|-------------------|------------------|-------------|------------|-------------|
| Western Obese | 181.9±4.3         | 194.9±5.3*       | 2.7±0.2     | 8.3±0.7**  | 91.1±0.7    |
| Western Lean  | 177.3±6.9         | 180.5±6.1        | 2.8±0.2     | 4.2±0.1    | 95.8±0.1    |
| Rat Chow      | 169.2±5.3         | 178.9±5.8        | 2.6±0.2     | 4.3±0.3    | 95.6±0.4    |

**Table S4 Body composition analysis from DEXA scans.** Animals in the Western-obese group showed a significant increase in fat mass compared to animals in the Western-lean group. Values represent mean ± SEM. n= 9 animals per group. Asterisk indicates P<0.05, double asterisk indicates P<0.0001.

## Supplementary Table S5

| Group         | Number of Rats | Total Number of Lesions and Major Lesion Type per Group | Number of Carcinomas per Group |
|---------------|----------------|---------------------------------------------------------|--------------------------------|
| Western Obese | n=9            | 39* (adenocarcinomas)                                   | 27*                            |
| Western Lean  | n=9            | 27 (adenomas)                                           | 13                             |
| Rat Chow      | n=9            | 21 (pre-neoplastic lesions)                             | 12                             |

**Table S5 Categorization of tumor number and tumor type in each group of animals.** Tumors were classified as malignant carcinomas, benign adenomas, or pre-neoplastic lesions based on the morphology of the epithelial cells. Asterisk indicates  $P < 0.05$ .

## Supplementary Table S6

| Diet treatment phenotype | Obese      | Lean       | RD             |
|--------------------------|------------|------------|----------------|
| <b>LEP+</b>              | 7<br>(78%) | 3<br>(33%) | 1<br>(11%)     |
| <b>LEP-</b>              | 2<br>(22%) | 6<br>(67%) | 8<br>(89%)     |
| <b>Total</b>             | 9          | 9          | 9              |
|                          |            |            | <b>P=0.02</b>  |
| <b>pSTAT3+</b>           | 8<br>(89%) | 1<br>(11%) | 2<br>(22%)     |
| <b>pSTAT3-</b>           | 1<br>(11%) | 8<br>(89%) | 7<br>(78%)     |
| <b>Total</b>             | 9          | 9          | 9              |
|                          |            |            | <b>P=0.002</b> |
| <b>miR200c+</b>          | 1<br>(11%) | 7<br>(78%) | 8<br>(89%)     |
| <b>miR200c-</b>          | 8<br>(89%) | 2<br>(22%) | 1<br>(11%)     |
| <b>Total</b>             | 9          | 9          | 9              |
|                          |            |            | <b>P=0.002</b> |
| <b>OBR+</b>              | 8<br>(89%) | 2<br>(22%) | 1<br>(11%)     |
| <b>OBR-</b>              | 1<br>(11%) | 7<br>(78%) | 8<br>(89%)     |
| <b>Total</b>             | 9          | 9          | 9              |
|                          |            |            | <b>P=0.001</b> |

**Table S6 Elevated LEP, p-STAT3, and OBR levels are correlated with reduced miR-200c expression in diet-induced obesity and breast cancer rats.** Fisher's exact analysis of expression levels of LEP, p-STAT3, miR-200c, and OBR in the mammary tumor sections from the Western diet-treated lean and obese rats and also from the control rats fed with regular diet. (-): negative/low staining, (+): positive/high staining.
